# Supplementary material for: Current and projected future economic burden of Parkinson’s disease in the U.S
Source: PubMed Central journal article supplement (PMC7347582; doi:10.1038/s41531-020-0117-1), 2020-07-09
Supplement: 41531_2020_117_MOESM1_ESM.pdf [file 41531_2020_117_MOESM1_ESM.pdf]

**Supplementary Information File for “Current and Projected Future Economic Burden of Parkinson's Disease in the U.S.”**

**Supplementary Table 1. Parkinson's disease prevalence by population characteristics (in 2017)**

|                  | No. of Persons<br>Estimated to Have PD | Population  | Prevalence |
|------------------|----------------------------------------|-------------|------------|
| <b>Age</b>       |                                        |             |            |
| ≤49              | 17,000                                 | 212,270,000 | 0.01%      |
| 50-64            | 184,000                                | 63,810,000  | 0.29%      |
| 65-74            | 385,000                                | 28,860,000  | 1.33%      |
| ≥75              | 452,000                                | 20,779,000  | 2.18%      |
| <b>Gender</b>    |                                        |             |            |
| Male             | 595,000                                | 160,355,000 | 0.37%      |
| Female           | 443,000                                | 165,364,000 | 0.27%      |
| <b>Insurance</b> |                                        |             |            |
| Private          | 77,000                                 | 176,965,000 | 0.04%      |
| Medicare         | 919,000                                | 56,213,000  | 1.63%      |
| Other*           | 42,000                                 | 92,541,000  | 0.05%      |

Source: Author’s calculations using 2011-2015 MEPS, 2015 MCBS, and Census population projection for 2017.

\*Other includes Medicaid, other insurance, and uninsured.

**Supplementary Table 2. Comparison of age, gender, & race/ethnicity between Parkinson's disease and comparison groups by data source**

|                                            |          | PD     |         | Comparison |         |
|--------------------------------------------|----------|--------|---------|------------|---------|
|                                            |          | N      | Percent | N          | Percent |
| <b>Optum Claims Data</b>                   |          |        |         |            |         |
| Gender                                     | Male     | 1,575  | 60.5%   | 15,750     | 60.5%   |
|                                            | Female   | 1,029  | 39.5%   | 10,290     | 39.5%   |
| Age Group                                  | ≤49      | 408    | 15.7%   | 4,080      | 15.7%   |
|                                            | 50-64    | 2,196  | 84.3%   | 21,960     | 84.3%   |
|                                            | 65-74    | N/A    | N/A     | N/A        | N/A     |
|                                            | ≥75      | N/A    | N/A     | N/A        | N/A     |
| Race/Ethnicity                             | NH White | 1,803  | 69.2%   | 18,030     | 69.2%   |
|                                            | NH Black | 95     | 3.7%    | 950        | 3.7%    |
|                                            | Hispanic | 176    | 6.8%    | 1,760      | 6.8%    |
|                                            | Other    | 246    | 9.4%    | 2,460      | 9.4%    |
|                                            | Unknown  | 284    | 10.9%   | 2,840      | 10.9%   |
| <b>Medicare 5%</b>                         |          |        |         |            |         |
| Gender                                     | Male     | 12,102 | 54.0%   | 121,020    | 54.0%   |
|                                            | Female   | 10,308 | 46.0%   | 103,080    | 46.0%   |
| Age Group                                  | ≤49      | 209    | 0.9%    | 2,090      | 0.9%    |
|                                            | 50-64    | 1,654  | 7.4%    | 16,540     | 7.4%    |
|                                            | 65-74    | 7,406  | 33.1%   | 74,060     | 33.1%   |
|                                            | ≥75      | 13,141 | 58.6%   | 131,410    | 58.6%   |
| Race/Ethnicity                             | NH White | 19,579 | 87.4%   | 195,790    | 87.4%   |
|                                            | NH Black | 1,311  | 5.9%    | 13,110     | 5.9%    |
|                                            | Hispanic | 418    | 1.9%    | 4,180      | 1.9%    |
|                                            | Other    | 888    | 4.0%    | 8,880      | 4.0%    |
|                                            | Unknown  | 214    | 1.0%    | 2,140      | 1.0%    |
| <b>Medicare Current Beneficiary Survey</b> |          |        |         |            |         |
| Gender                                     | Male     | 97     | 55.1%   | 970        | 55.1%   |
|                                            | Female   | 79     | 44.9%   | 790        | 44.9%   |
| Age Group                                  | ≤49      | 6      | 3.4%    | 60         | 3.4%    |
|                                            | 50-64    | 10     | 5.7%    | 100        | 5.7%    |
|                                            | 65-74    | 45     | 25.6%   | 450        | 25.6%   |
|                                            | ≥75      | 115    | 65.3%   | 1,150      | 65.3%   |
| Race/Ethnicity                             | NH White | 144    | 81.8%   | 1,140      | 81.8%   |
|                                            | NH Black | 11     | 6.3%    | 110        | 6.3%    |
|                                            | Hispanic | 19     | 10.8%   | 190        | 10.8%   |
|                                            | Other    | 2      | 1.1%    | 20         | 1.1%    |
|                                            | Unknown  | N/A    | N/A     | N/A        | N/A     |

Source: Author's calculations using the 2016 Optum claims, 2015 Medicare Standard Analytical File 5% sample claims, and 2015 Medicare Current Beneficiary Survey (MCBS).

**Supplementary Table 3. Estimated net present value of the future earnings loss for premature deaths associated with Parkinson's disease**

|                | Estimated Number of Premature Deaths | Estimated Present Value of Future Earnings/Death (\$) | Estimated NPV (in Million \$s) |
|----------------|--------------------------------------|-------------------------------------------------------|--------------------------------|
| <b>Males</b>   |                                      |                                                       |                                |
| ≤49 years      | 18                                   | 909,826                                               | 16                             |
| 50-64 years    | 2,139                                | 345,062                                               | 738                            |
| 65-74 years    | 13,511                               | 57,337                                                | 775                            |
| <b>Females</b> |                                      |                                                       |                                |
| ≤49 years      | 171                                  | 769,680                                               | 132                            |
| 50-64 years    | 2,219                                | 283,802                                               | 630                            |
| 65-74 years    | 5,335                                | 40,774                                                | 218                            |
| <b>Overall</b> | <b>23,393</b>                        | <b>107,214</b>                                        | <b>2,508</b>                   |

Source: Lewin analyses of 2014-2016 CDC Wonder and 2015 Medicare 5% sample claims data. Death rates for ≥65 were derived from Medicare 5% data. Death rates for <65 non-PD population were derived from CDC WONDER data. Death rates for <65 PD population are estimated. Average earnings by age and gender obtained from Bureau of Labor Statistics.

**Supplementary Table 4. Sample breakdown by respondents' self-description from the survey**

| Which of the following <u>best describes you</u> (the person who is responding to the survey)? | Freq. | Percent |
|------------------------------------------------------------------------------------------------|-------|---------|
| A person with PD                                                                               | 3,098 | 67.1    |
| A care partner for someone who has PD                                                          | 1,264 | 27.4    |
| A family member of someone who has PD, but not a care partner                                  | 180   | 3.9     |
| A close friend of someone who has PD, but not a care partner                                   | 6     | 0.1     |
| Sub-total                                                                                      | 4,548 |         |
| Do not have PD and do not know anyone with PD                                                  | 69    | 1.5     |
| Total number of respondents                                                                    | 4,617 |         |

Source: Primary data collected through the PD Impact Survey

**Supplementary Table 5. Disease duration for persons with Parkinson's disease**

|                  | Unweighted |         | Weighted  |         |
|------------------|------------|---------|-----------|---------|
|                  | Frequency  | Percent | Frequency | Percent |
| N                | 4,548      | 100     | 1,037,211 | 100     |
| Less than 1 year | 206        | 4.5     | 40,474    | 3.9     |
| 1-5 years        | 1,537      | 33.8    | 329,114   | 31.7    |
| 5-10 years       | 1,256      | 27.6    | 289,176   | 27.9    |
| 10-15 years      | 641        | 14.1    | 153,504   | 14.8    |
| 15 or more       | 539        | 11.9    | 140,468   | 13.5    |
| Missing          | 369        | 8.1     | 84,476    | 8.1     |

Source: Primary data collected through the PD Impact Survey

**Supplementary Table 6. Percentage of persons with Parkinson's disease who spent time at a long-term care facility in the past 12 months**

|                                         | Unweighted |         | Weighted  |         |
|-----------------------------------------|------------|---------|-----------|---------|
|                                         | Frequency  | Percent | Frequency | Percent |
| N                                       | 4,548      | 100     | 1,037,211 | 100     |
| Private (alone or with someone)         | 4,284      | 94.2    | 955,084   | 92.1    |
| Nursing home                            | 192        | 4.2     | 65,983    | 6.4     |
| Hospice facility                        | 25         | 0.55    | 7,726     | 0.74    |
| Active adult or senior living community | 183        | 4.0     | 59,931    | 5.8     |
| Other "long-term" care facility         | 115        | 2.5     | 35,815    | 3.5     |

Source: Primary data collected through the PD Impact Survey

**Supplementary Table 7. Percentage of persons with Parkinson’s disease who received unpaid care from a care partner in the past 12 months**

|                                                   |                | Unweighted |         | Weighted  |         |
|---------------------------------------------------|----------------|------------|---------|-----------|---------|
|                                                   |                | Frequency  | Percent | Frequency | Percent |
| Received Care from a Primary Care Partner (PCP)   | Total          | 4,548      | 100     | 1,037,211 | 100     |
|                                                   | Yes            | 2,677      | 58.9    | 648,185   | 62.5    |
|                                                   | No             | 1,420      | 31.2    | 292,655   | 28.2    |
|                                                   | Not applicable | 451        | 9.9     | 96,371    | 9.3     |
| Received Care from a Secondary Care Partner (SCP) | Total          | 4,548      | 100     | 1,037,211 | 100     |
|                                                   | Yes            | 716        | 15.7    | 190,936   | 18.4    |
|                                                   | No             | 2,748      | 60.4    | 594,623   | 57.3    |
|                                                   | Not applicable | 1,084      | 23.8    | 251,652   | 24.3    |

Source: Primary data collected through the PD Impact Survey

**Supplementary Table 8. Baseline characteristics of the persons with Parkinson’s disease and unpaid care partners**

|                       |                    |   | Unweighted |       |      | Weighted  |         |         |
|-----------------------|--------------------|---|------------|-------|------|-----------|---------|---------|
|                       |                    |   | PWP        | PCP   | SCP  | PWP       | PCP     | SCP     |
| <b>All</b>            |                    |   | 4,548      | 2,654 | 683  | 1,037,211 | 642,947 | 182,964 |
| <b>Age</b>            | ≤49                | N | 162        | 204   | 373  | 16,695    | 37,276  | 84,142  |
|                       |                    | % | 3.6        | 7.7   | 54.6 | 1.6       | 5.8     | 46.0    |
|                       | 50-64              | N | 1,335      | 811   | 209  | 183,767   | 165,122 | 72,295  |
|                       |                    | % | 29.4       | 30.6  | 30.6 | 17.7      | 25.7    | 38.5    |
|                       | 65-74              | N | 1,937      | 1,126 | 72   | 384,944   | 255,939 | 20,733  |
|                       |                    | % | 42.6       | 42.4  | 10.5 | 37.1      | 39.8    | 11.3    |
|                       | ≥75                | N | 1,101      | 513   | 29   | 451,806   | 184,609 | 5,794   |
|                       |                    | % | 24.2       | 19.3  | 4.2  | 43.6      | 28.7    | 3.2     |
|                       | Missing            | N | 13         | .     | .    | 0         | .       | .       |
|                       |                    | % | 0.3        | .     | .    | 0         | .       | .       |
| <b>Gender</b>         | Female             | N | 1,732      | 1,882 | 439  | 442,580   | 449,729 | 119,099 |
|                       |                    | % | 38.1       | 70.3  | 61.3 | 42.7      | 69.4    | 62.4    |
|                       | Male               | N | 2,764      | 783   | 240  | 594,631   | 196,100 | 62,793  |
|                       |                    | % | 60.8       | 29.3  | 33.5 | 57.3      | 30.2    | 32.9    |
|                       | Prefer not to say  | N | 52         | 12    | 37   | 0         | 2,357   | 9,044   |
|                       |                    | % | 1.1        | 0.4   | 5.2  | .         | 0.4     | 4.7     |
| <b>Race/ethnicity</b> | White Non-Hispanic | N | 3,989      | 2,371 | 585  | 921,638   | 574,498 | 157,285 |
|                       |                    | % | 87.7       | 88.6  | 81.7 | 88.9      | 88.6    | 82.4    |
|                       | Black Non-Hispanic | N | 34         | 29    | 11   | 6,295     | 5,727   | 2,559   |
|                       |                    | % | 0.7        | 1.1   | 1.5  | 0.6       | 0.9     | 1.3     |
|                       | Other Non-Hispanic | N | 138        | 93    | 51   | 30,081    | 22,670  | 13,099  |
|                       |                    | % | 3.0        | 3.5   | 7.1  | 2.9       | 3.5     | 6.9     |
|                       | Hispanic           | N | 126        | 66    | 20   | 27,277    | 17,198  | 5,855   |
|                       |                    | % | 2.8        | 2.5   | 2.8  | 2.6       | 2.7     | 3.1     |
|                       | Prefer not to say  | N | 261        | 118   | 49   | 51,920    | 28,092  | 12,138  |
|                       |                    | % | 5.7        | 4.4   | 6.8  | 5.0       | 4.3     | 6.4     |

Source: Primary data collected through the PD Impact Survey. PWP: Person with Parkinson’s disease; PCP – received care from a primary care partner; and SCP – received care from a secondary care partner.
